# Supplementary material for: Mix-and-matching as a promoter recognition mechanism by ECF σ factors
Source: PubMed Central journal article supplement (PMC5333181; doi:10.1186/s12862-016-0865-z), 2017-02-07
Supplement: 12862_2016_865_MOESM1_ESM.pdf [file 12862_2016_865_MOESM1_ESM.pdf]

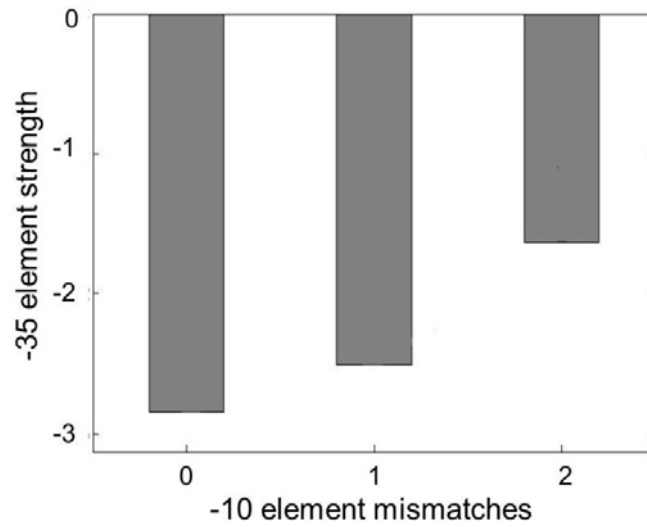

**Supplement Figure 1: Mix-and-matching in  $\sigma^W$  sequences.** A correlation between the average dsDNA element strength (assessed by the weight matrix score – y-axis) and ssDNA element strength (assessed by the number of mismatches in the corresponding -10 elements – x-axis) is shown. Note that stronger -35 element strength is associated with larger (less negative) weight matrix score.
